# Supplementary material for: Vancomycin-Lipopeptide Conjugates with High Antimicrobial Activity on Vancomycin-Resistant Enterococci
Source: PubMed Central journal article supplement (PMC7345083; doi:10.3390/ph13060110), 2020-05-29
Supplement: pharmaceuticals-13-00110-s001.pdf [file pharmaceuticals-13-00110-s001.pdf]

## Supplementary Information:

### “Vancomycin-Lipopeptide Conjugates with High Antimicrobial Activity on Vancomycin-Resistant Enterococci”

**Table S1:** Tested conjugates, their respective MIC median values and MIC range against the vanA-resistant, clinical isolate of *E. faecium* UL602570 are shown.

| Compound                                          | MIC median [mg/L] | MIC range [mg/L] |
|---------------------------------------------------|-------------------|------------------|
| V <sub>V</sub> -R <sub>3</sub> C                  | 4.35              | 4.35 – 8.69      |
| V <sub>V</sub> -R <sub>3</sub> C-C <sub>6</sub>   | 4.63              | 2.31 – 9.25      |
| V <sub>V</sub> -R <sub>3</sub> C-C <sub>8</sub>   | 1.49              | 0.30 – 2.39      |
| V <sub>V</sub> -R <sub>3</sub> C-C <sub>10</sub>  | 0.63              | 0.05 – 0.84      |
| V <sub>V</sub> -R <sub>3</sub> C-C <sub>12</sub>  | 0.24              | 0.06 – 0.48      |
| V <sub>V</sub> -R <sub>3</sub> C-C <sub>14</sub>  | 0.46              | 0.31 – 0.62      |
| V <sub>V</sub> -R <sub>3</sub> C-C <sub>16</sub>  | 2.50              | 2.50 – 3.50      |
| V <sub>V</sub> -R <sub>3</sub> C-C <sub>18</sub>  | 2.54              | 1.27 – 2.54      |
| V <sub>V</sub> -R <sub>3y</sub> C-C <sub>12</sub> | 1.02              | 0.25 – 2.03      |
| V <sub>N</sub> -R <sub>3</sub> C                  | 67.75             | 32.00 – 67.75    |
| V <sub>N</sub> -R <sub>3</sub> C-C <sub>6</sub>   | 72.00             | 36.00 – 72.00    |
| V <sub>N</sub> -R <sub>3</sub> C-C <sub>8</sub>   | 18.31             | 9.16 – 18.31     |
| V <sub>N</sub> -R <sub>3</sub> C-C <sub>10</sub>  | 4.66              | 4.66 – 9.31      |
| V <sub>N</sub> -R <sub>3</sub> C-C <sub>12</sub>  | 2.37              | 2.37 – 4.73      |
| V <sub>N</sub> -R <sub>3</sub> C-C <sub>14</sub>  | 2.41              | 2.41 – 4.81      |
| V <sub>N</sub> -R <sub>3</sub> C-C <sub>16</sub>  | 2.45              | 2.45 – 4.89      |
| V <sub>N</sub> -R <sub>3</sub> C-C <sub>18</sub>  | 4.97              | 2.48 – 4.97      |
| V <sub>C</sub> -R <sub>3</sub> C                  | 34.75             | 17.38 – 34.75    |
| V <sub>C</sub> -R <sub>3</sub> C-C <sub>6</sub>   | 106.00            | -                |
| V <sub>C</sub> -R <sub>3</sub> C-C <sub>8</sub>   | 9.54              | 9.54 – 19.08     |
| V <sub>C</sub> -R <sub>3</sub> C-C <sub>10</sub>  | 4.77              | 4.77 – 9.53      |
| V <sub>C</sub> -R <sub>3</sub> C-C <sub>12</sub>  | 4.84              | 2.42 – 4.84      |
| V <sub>C</sub> -R <sub>3</sub> C-C <sub>14</sub>  | 2.45              | 2.45 – 4.91      |
| V <sub>C</sub> -R <sub>3</sub> C-C <sub>16</sub>  | 5.00              | 5.00 – 10.00     |
| V <sub>C</sub> -R <sub>3</sub> C-C <sub>18</sub>  | 10.17             | 5.08 – 10.17     |

**Table S2:** The tested conjugates, their respective MIC median values and MIC range against the vanA-resistant strain of *E. faecium* ATCC 51559, the vanB-resistant strain of *E. faecalis* ATCC 51299 and the vanC-resistant strain of *E. casseliflavus* ATCC 700327 are shown.

| Compound                                         | ATCC 51559        |                  | ATCC 51299        |                  | ATCC 700327       |                  |
|--------------------------------------------------|-------------------|------------------|-------------------|------------------|-------------------|------------------|
|                                                  | MIC median [mg/L] | MIC range [mg/L] | MIC median [mg/L] | MIC range [mg/L] | MIC median [mg/L] | MIC range [mg/L] |
| V <sub>V</sub> -R <sub>3</sub> C-C <sub>12</sub> | 3.88              | 3.88 – 7.75      | 4                 | -                | 2.5               | 0.5 – 4          |
| V <sub>N</sub> -R <sub>3</sub> C-C <sub>12</sub> | 4.72              | 4.72 – 9.44      | 4                 | -                | 2.5               | 1 – 4            |
| V <sub>C</sub> -R <sub>3</sub> C-C <sub>12</sub> | 4.84              | 4.84 – 9.69      | 4                 | -                | 4                 | 1 – 4            |

**Table S3:** The conjugates evaluated in the hemoglobin release assay, applied concentrations and the respective hemoglobin release are shown.

| Compound                                         | Concentration [ $\mu\text{M}$ ] |              |             |              |              |              |              |              |              |              |
|--------------------------------------------------|---------------------------------|--------------|-------------|--------------|--------------|--------------|--------------|--------------|--------------|--------------|
|                                                  | 833.00                          | 416.50       | 208.25      | 104.13       | 52.06        | 26.03        | 13.02        | 6.51         | 3.25         | 1.63         |
|                                                  | Hemoglobin release [%]          |              |             |              |              |              |              |              |              |              |
| V <sub>V</sub> -R <sub>3</sub> C-C <sub>6</sub>  | 4.77 ± 1.92                     | 1.38 ± 0.53  | 0.55 ± 0.59 | 0.08 ± 0.85  | -0.08 ± 0.66 | 0.18 ± 0.40  | -0.06 ± 0.36 | -0.29 ± 0.50 | -0.13 ± 0.48 | -0.41 ± 0.53 |
| V <sub>V</sub> -R <sub>3</sub> C-C <sub>12</sub> | 6.01 ± 1.54                     | 4.02 ± 0.58  | 0.93 ± 1.04 | 0.64 ± 0.68  | 0.53 ± 0.63  | 0.43 ± 0.71  | 0.06 ± 0.56  | 0.08 ± 0.64  | -0.02 ± 0.58 | 0.31 ± 0.94  |
| V <sub>V</sub> -R <sub>3</sub> C                 | 15.32 ± 2.21                    | 2.13 ± 0.52  | 0.14 ± 0.83 | -0.11 ± 0.41 | -0.15 ± 0.49 | 0.08 ± 0.66  | -0.42 ± 0.44 | -0.29 ± 0.44 | -0.14 ± 0.47 | 0.24 ± 0.42  |
| V <sub>N</sub> -R <sub>3</sub> C-C <sub>12</sub> | 11.68 ± 5.56                    | 4.02 ± 1.76  | 1.78 ± 0.37 | 2.07 ± 1.00  | 0.58 ± 0.39  | 0.32 ± 0.33  | 0.11 ± 0.29  | 0.24 ± 0.24  | -0.01 ± 0.18 | -0.05 ± 0.29 |
| V <sub>C</sub> -R <sub>3</sub> C-C <sub>12</sub> | 21.83 ± 2.60                    | 8.45 ± 4.58  | 4.70 ± 1.60 | 2.38 ± 1.40  | 0.78 ± 0.48  | 0.61 ± 0.35  | 0.34 ± 0.22  | 0.46 ± 0.28  | 0.10 ± 0.16  | 0.16 ± 0.59  |
| Vancomycin                                       | 0.55 ± 0.32                     | 0.34 ± 0.48  | 0.38 ± 0.43 | 0.19 ± 0.28  | 0.19 ± 0.23  | 0.28 ± 0.33  | 0.08 ± 0.26  | -0.01 ± 0.23 | 0.00 ± 0.19  | -0.04 ± 0.19 |
| Compound                                         | Concentration [ $\mu\text{M}$ ] |              |             |              |              |              |              |              |              |              |
|                                                  | 799.00                          | 399.50       | 199.75      | 99.88        | 49.94        | 24.97        | 12.48        | 6.24         | 3.12         | 1.56         |
|                                                  | Hemoglobin release [%]          |              |             |              |              |              |              |              |              |              |
| V <sub>V</sub> -R <sub>3</sub> C-C <sub>18</sub> | 14.82 ± 2.04                    | 11.62 ± 1.58 | 8.26 ± 1.17 | 4.61 ± 1.10  | 1.03 ± 1.18  | -0.24 ± 0.40 | -0.28 ± 0.36 | -0.22 ± 0.37 | -0.45 ± 0.40 | -0.21 ± 0.34 |

**Table S4:** The tested conjugates, their respective viability and concentration (evaluated on HuH7 cells) are shown.

| Compound                                         | Concentration   |                  |                 |                  |                 |                  |                 |                  |
|--------------------------------------------------|-----------------|------------------|-----------------|------------------|-----------------|------------------|-----------------|------------------|
|                                                  | 8x MIC          |                  | 4x MIC          |                  | 2x MIC          |                  | 1x MIC          |                  |
|                                                  | Conc.<br>[mg/L] | Viability<br>[%] | Conc.<br>[mg/L] | Viability<br>[%] | Conc.<br>[mg/L] | Viability<br>[%] | Conc.<br>[mg/L] | Viability<br>[%] |
| V <sub>V</sub> -R <sub>3</sub> C-C <sub>6</sub>  | 37.04           | 108.25 ± 4.55    | 18.52           | 108.18 ± 4.33    | 9.26            | 108.10 ± 3.73    | 4.63            | 110.27 ± 1.30    |
| V <sub>V</sub> -R <sub>3</sub> C-C <sub>12</sub> | 1.92            | 99.37 ± 0.80     | 0.96            | 101.72 ± 6.94    | 0.48            | 100.74 ± 4.90    | 0.24            | 107.55 ± 0.96    |
| V <sub>V</sub> -R <sub>3</sub> C-C <sub>18</sub> | 20.00           | 91.97 ± 3.06     | 10.00           | 100.40 ± 2.43    | 5.00            | 103.72 ± 5.62    | 2.50            | 104.43 ± 1.87    |
| V <sub>V</sub> -R <sub>3</sub> C                 | 34.80           | 98.33 ± 0.71     | 17.40           | 105.10 ± 3.48    | 8.70            | 108.49 ± 6.90    | 4.35            | 113.03 ± 6.02    |
